# Supplementary material
Source: Springer Nature journal article supplement (https://www.springermedizin.de/resource/supplementary/13046_2008_82_MOESM3_ESM.pdf/9661478)

**A****Mock****LCN2**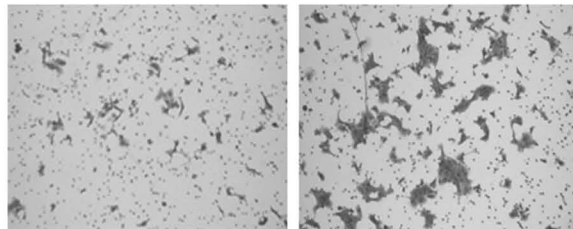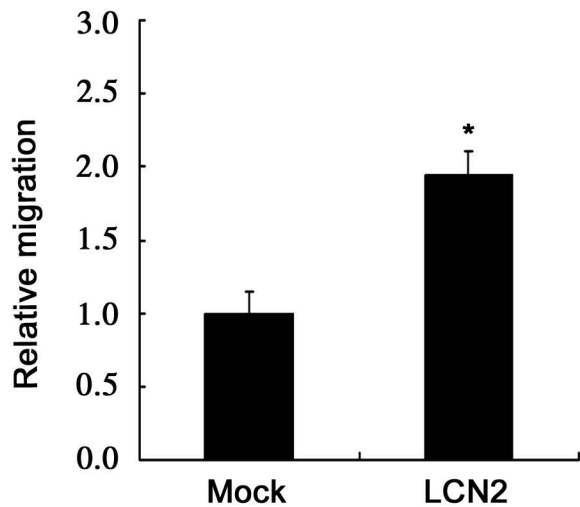**B****Mock****LCN2**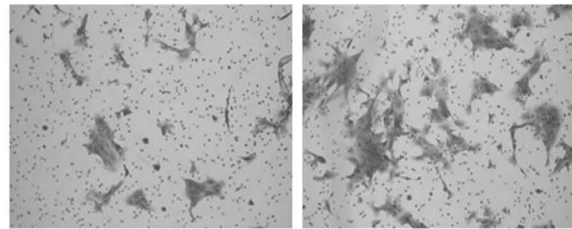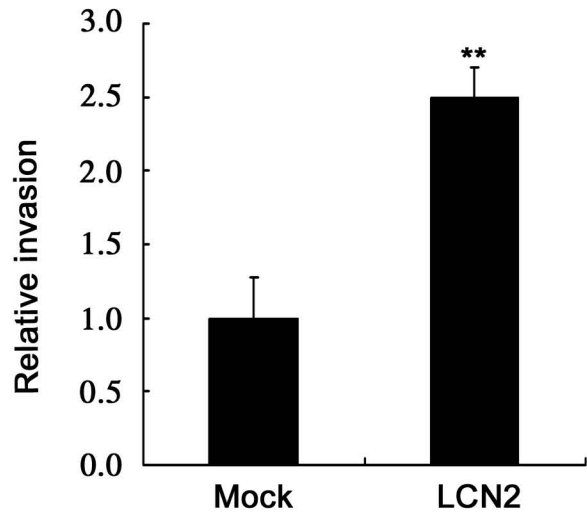

Supplement: MOESM3 [file 9661478]
